# Supplementary material
Source: Springer Nature journal article supplement (https://www.springermedizin.de/resource/supplementary/12963_2013_235_MOESM10_ESM.pdf/9572444)

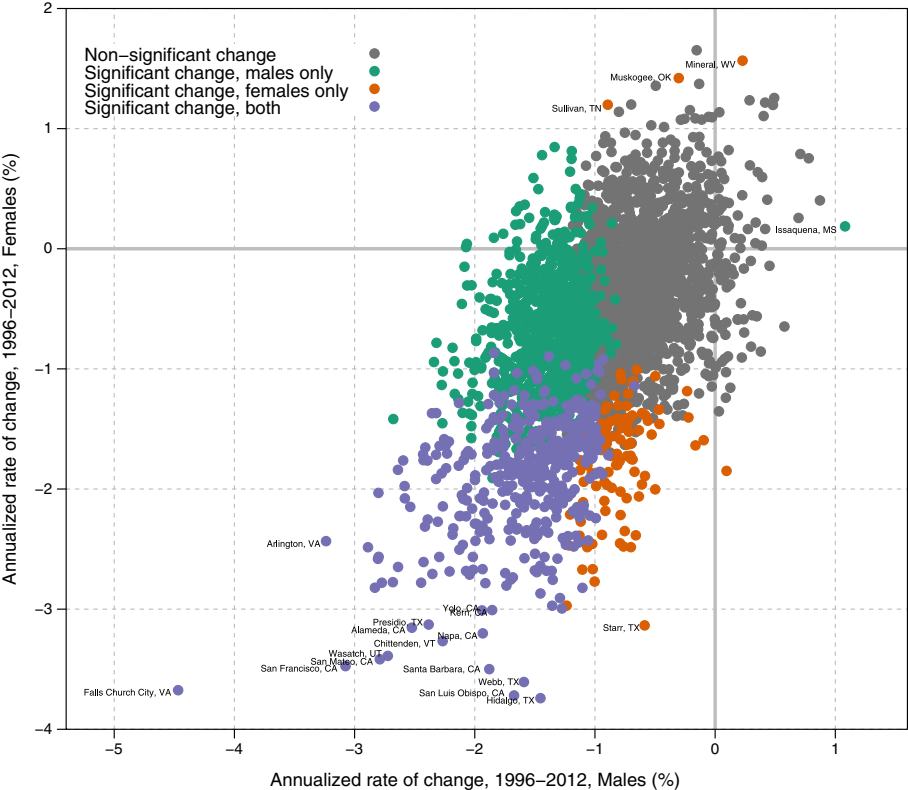

Supplement: MOESM10 [file 9572444]
